# Supplementary material for: Engineering globins for efficient biodegradation of malachite green: two case studies of myoglobin and neuroglobin
Source: Royal Society of Chemistry journal article supplement (doi:10.1039/d2ra02795j), 2022-01-01
Supplement: d2ra02795j1.pdf [file d2ra02795j1.pdf]

## Supporting Information for

### Engineering Globins for Efficient Biodegradation of Malachite Green:

#### Two Case Studies of Myoglobin and Neuroglobin

Jiao Liu <sup>a†</sup>, Jia-Kun Xu <sup>b†\*</sup>, Hong Yuan <sup>c</sup>, Xiao-Juan Wang <sup>d\*</sup>, Shu-Qin Gao <sup>d</sup>, Ge-Bo Wen <sup>d</sup>,  
Xiang-Shi Tan <sup>c</sup>, Ying-Wu Lin <sup>a,d\*</sup>

<sup>a</sup> *School of Chemistry and Chemical Engineering, University of South China, Hengyang 421001, China;*

<sup>b</sup> *Key Lab of Sustainable Development of Polar Fisheries, Yellow Sea Fisheries Research Institute, Chinese Academy of Fishery Sciences, Qingdao 266071, China;*

<sup>c</sup> *Department of Chemistry & Institute of Biomedical Science, Fudan University, Shanghai 200433, China;*

<sup>d</sup> *Lab of Protein Structure and Function, University of South China, Hengyang 421001, China.*

† These authors contributed equally.

Corresponding authors:

\*E-mail: ywlin@usc.edu.cn (Y.-W. Lin); xujk@ysfri.ac.cn (J.-K. Xu); wxj0207@126.com (X.-J. Wang)

**Table S1.** Summary of data collection and refinement statistics of H64D Mb.

---

|                                |                            |
|--------------------------------|----------------------------|
| Wavelength                     | 0.9791                     |
| Resolution range               | 24.15 - 1.6 (1.657 - 1.6)  |
| Space group                    | P 21 21 21                 |
| Unit cell                      | 39.74 49.12 77.44 90 90 90 |
| Total reflections              | 261270 (27042)             |
| Unique reflections             | 20632 (2037)               |
| Multiplicity                   | 12.7 (13.3)                |
| Completeness (%)               | 99.92 (100.00)             |
| Mean I/sigma(I)                | 19.84 (6.93)               |
| Wilson B-factor                | 15.08                      |
| R-merge                        | 0.09199 (0.5325)           |
| R-meas                         | 0.09601 (0.5538)           |
| R-pim                          | 0.02712 (0.151)            |
| CC1/2                          | 0.998 (0.964)              |
| CC*                            | 1 (0.991)                  |
| Reflections used in refinement | 20645 (2037)               |
| Reflections used for R-free    | 1020 (99)                  |
| R-work                         | 0.1781 (0.2046)            |
| R-free                         | 0.1890 (0.2194)            |
| CC(work)                       | 0.958 (0.872)              |
| CC(free)                       | 0.951 (0.886)              |
| Number of non-hydrogen atoms   | 1454                       |
| macromolecules                 | 1218                       |
| ligands                        | 43                         |
| solvent                        | 193                        |
| Protein residues               | 153                        |
| RMS(bonds)                     | 0.008                      |
| RMS(angles)                    | 1.16                       |
| Ramachandran favored (%)       | 97.35                      |
| Ramachandran allowed (%)       | 2.65                       |
| Ramachandran outliers (%)      | 0.00                       |
| Rotamer outliers (%)           | 0.00                       |
| Clashscore                     | 5.13                       |
| Average B-factor               | 19.54                      |
| macromolecules                 | 17.88                      |
| ligands                        | 14.89                      |
| solvent                        | 31.02                      |

---

Statistics for the highest-resolution shell are shown in parentheses.

**Table S2:** Docking results of MG to H64D Mb AutoDock program.

| Model | $E_{\text{binding}}^{\text{a}}$ | $E_{\text{inter-mol}}^{\text{b}}$ | $E_{\text{vdw}}^{\text{c}}$ | $E_{\text{elec}}^{\text{d}}$ |
|-------|---------------------------------|-----------------------------------|-----------------------------|------------------------------|
| 1     | -5.92                           | -6.82                             | -2.35                       | -0.20                        |
| 2     | -5.90                           | -6.79                             | -2.25                       | -0.19                        |
| 3     | -5.87                           | -6.77                             | -2.24                       | -0.21                        |
| 4     | -5.82                           | -6.72                             | -2.18                       | -0.21                        |
| 5     | -5.81                           | -6.70                             | -2.22                       | -0.19                        |
| 6     | -5.73                           | -6.63                             | -2.14                       | -0.21                        |
| 7     | -5.71                           | -6.60                             | -2.15                       | -0.19                        |
| 8     | -5.62                           | -6.52                             | -2.23                       | -0.21                        |
| 9     | -5.59                           | -6.48                             | -2.07                       | -0.16                        |
| 10    | -5.59                           | -6.48                             | -2.08                       | -0.22                        |

<sup>a</sup> Binding energy. <sup>b</sup> Intermolecular energy. <sup>c</sup> van der Waals energies. <sup>d</sup> Electrostatic interactions.

**Table S3.** Docking results of MG to A15C/H64D Ngb AutoDock program.

| Model | $E_{\text{binding}}^{\text{a}}$ | $E_{\text{inter-mol}}^{\text{b}}$ | $E_{\text{vdw}}^{\text{c}}$ | $E_{\text{elec}}^{\text{d}}$ |
|-------|---------------------------------|-----------------------------------|-----------------------------|------------------------------|
| 1     | -5.42                           | -6.61                             | -2.40                       | -0.01                        |
| 2     | -5.38                           | -6.57                             | -2.45                       | -0.01                        |
| 3     | -5.37                           | -6.56                             | -2.45                       | -0.01                        |
| 4     | -5.34                           | -6.53                             | -2.33                       | 0.0                          |
| 5     | -5.32                           | -6.51                             | -2.33                       | 0.02                         |
| 6     | -5.29                           | -6.49                             | -2.40                       | 0.0                          |
| 7     | -5.28                           | -6.47                             | -2.00                       | -0.07                        |
| 8     | -5.28                           | -6.47                             | -2.26                       | 0.02                         |
| 9     | -5.26                           | -6.45                             | -2.34                       | -0.01                        |
| 10    | -5.23                           | -6.43                             | -2.36                       | 0.02                         |

<sup>a</sup> Binding energy. <sup>b</sup> Intermolecular energy. <sup>c</sup> van der Waals energies. <sup>d</sup> Electrostatic interactions.
